# Supplementary material
Source: MDPI journal article supplement (https://www.mdpi.com/2073-4395/13/1/28)
Supplement: s1 [file s1]

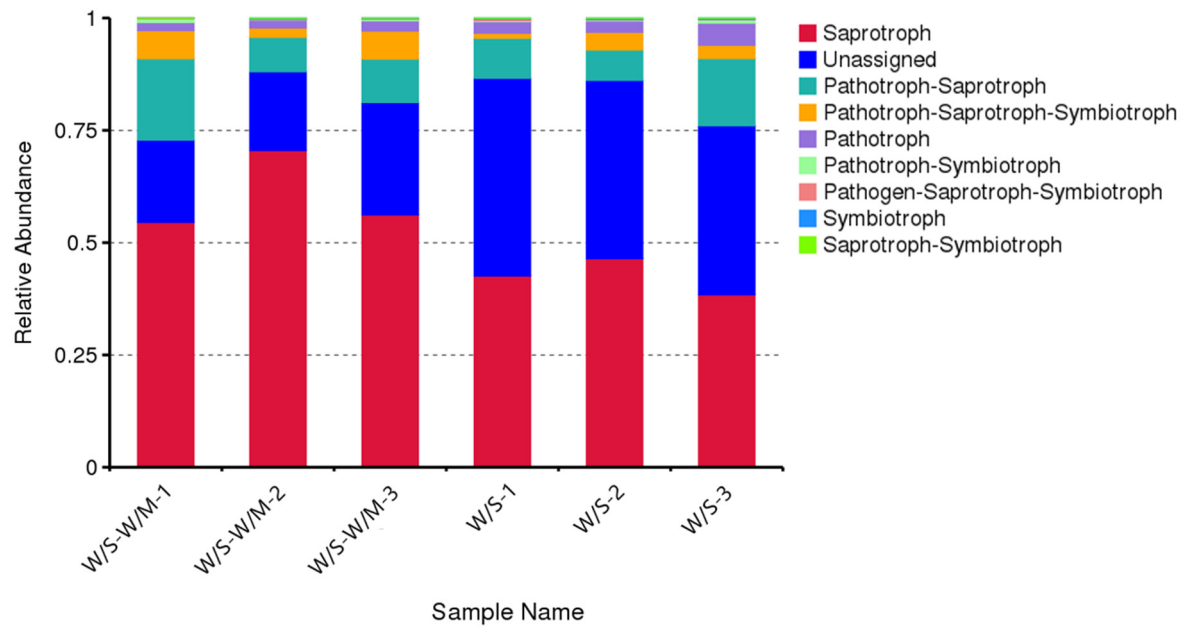

Figure S1. The FunGuild analysis of fungal community in the rhizosphere soils.

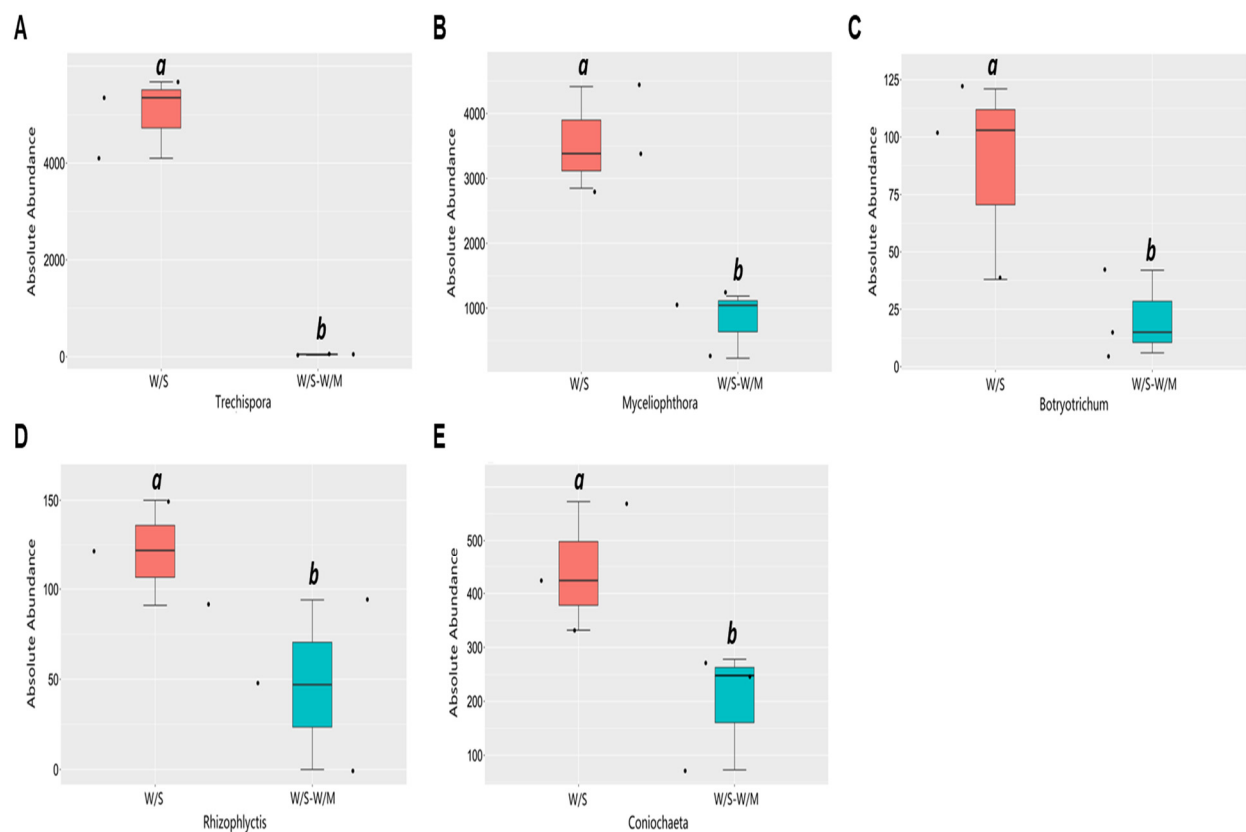

Figure S2. Relative abundance of lignocellulose-degrading fungi in two cropping systems. W/S, continuous wheat/soybean cropping system; W/S-W/M, wheat/soybean-wheat/maize rotation system.

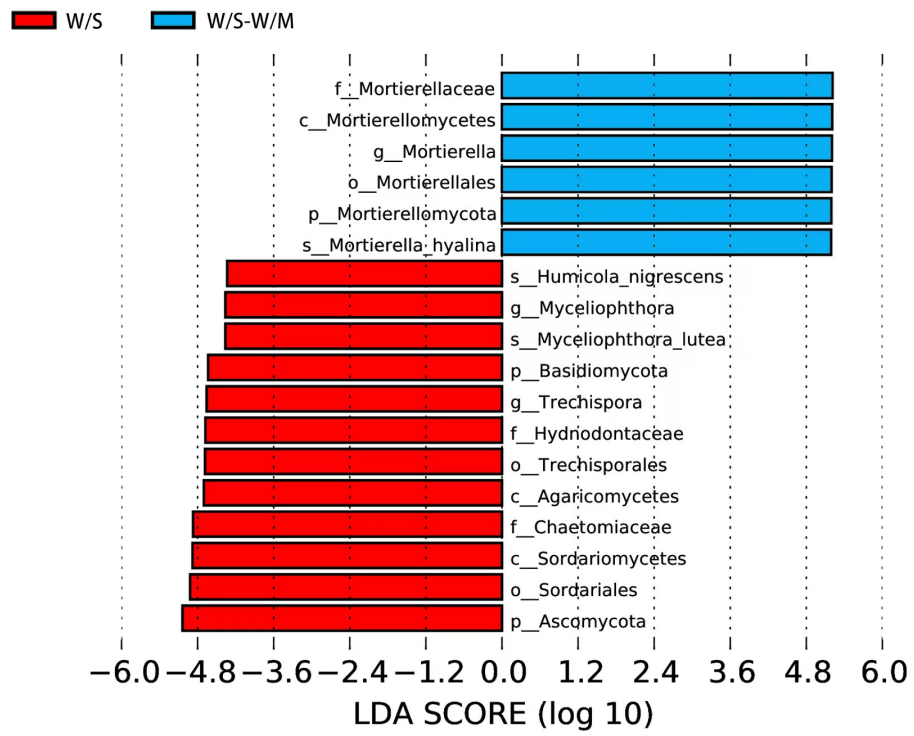

Figure S3. Histogram of the linear discriminant analysis (LDA) scores. Taxa enriched in W/S are shown in red and W/S-W/M in blue.
